# Supplementary material
Source: ML conference proceedings conference paper supplement (https://proceedings.neurips.cc/paper_files/paper/2019/hash/8f19793b2671094e63a15ab883d50137-Abstract.html)
Supplement: Supplementary file [file 8f19793b2671094e63a15ab883d50137-Supplemental.zip]

---

# Supplementary Material

## Heterogeneous Graph Learning for Visual Commonsense Reasoning

---

Anonymous Author(s)

Affiliation

Address

email

1 The supplementary material presents more experimental results of our heterogeneous graph learning  
2 framework (HGL) on VCR [1] dataset.

3 There are three section in our supplementary material to show our visualization and interpretation.

4 Sec. 1 provides the results of visual commonsense reasoning in VCR, as shown in Figure 1 and  
5 Figure 2.

6 Sec. 2 provides a pipeline of the interpretative visualization as shown in Figure 3.

7 Sec. 3 aims to show the details of the proposed modules to demonstrate the effectiveness and interpreta-  
8 tion of our VAHG, QAHG and CVM, which is shown in Figure 6 4 5 9 7 8 12 10 11 15 13 14 18 16 17,.

9 To fully demonstrate the effectiveness and interpretability of our proposed modules, we provide five  
10 examples (Figure 6 4 5 9 7 8 12 10 11 15 13 14 18 16 17) to show the learned vision-to-answer  
11 heterogeneous graph and question-to-answer heterogeneous graph, the visualization of heatmap to  
12 demonstrate the effectiveness of proposed contextual voting module.

### 13 1 Prediction Results

14 This section aims to present the prediction results of our HGL on VCR. Not only do we show the  
15 right results, but also we display our wrong prediction to better analyse our method, which is shown  
16 in Figure 1 2. It can be seen that our HGL outperforms well on many situations, while it may not  
17 well fit for the human emotion inference such as shown in the second example of Figure 2.

### 18 2 Interpretation Pipeline

19 This section presents a whole pipeline of our interpretation visualization, which is provided by  
20 Figure 3. There three ways of our visualization.

21 First, we utilize the correlative matrix to display the learned heterogeneous graph edges.

22 Second, we show a specific connection for VAHG and QAHG of the right prediction of our HGL for  
23 better understanding the semantic alignment between vision and linguistic domains. Note that the  
24 line thickness represents the weight.

25 Third, we provide a heatmap visualization to perform the highlight area in the visual scene conditioned  
26 by different tasks to further comprehend the contextual voting module.

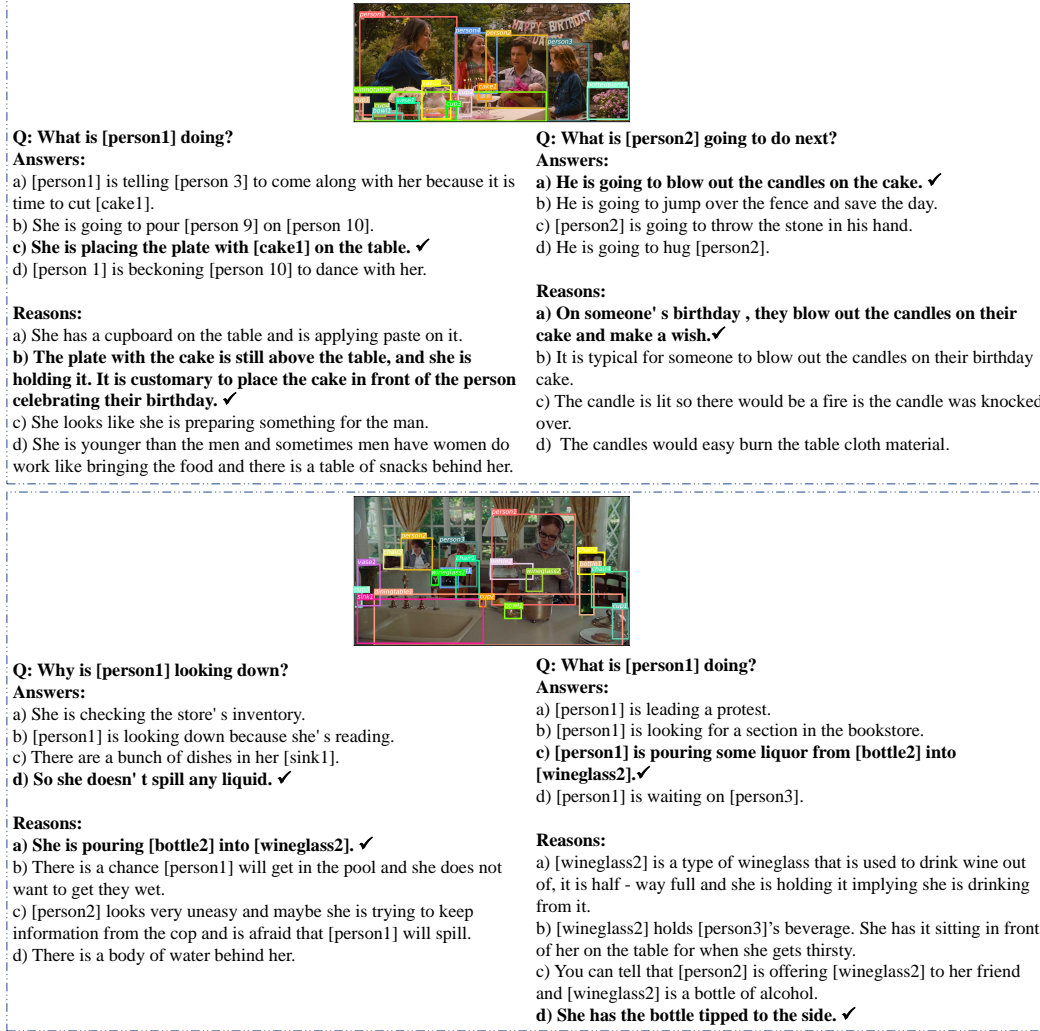

Figure 1: Qualitative results of our HGL. The predicted result is shown as **bold** font, and the ground truth (GT) is shown as ✓. Please zoom in the colored PDF version of this paper for more details.

### 27 3 Interpretation of Modules

28 In this section, we display five examples to show the effectiveness of each module that is applied  
29 into different scenes in detail. Note that each example contains three types of visualization, such as  
30 the visualization of vision-to-answer heterogeneous graph, the visualization of question-to-answer  
31 heterogeneous graph and the visualization of contextual voting module.

32 The first example is shown in Figure 5, Fig 4 and Figure 6 to demonstrate the effectiveness and  
33 interpretation of VAHG, QAHG and CVM in two tasks, respectively.

34 The second example is shown in Figure 8, Fig 7 and Figure 9 to demonstrate the effectiveness and  
35 interpretation of VAHG, QAHG and CVM in two tasks, respectively.

36 The third example is shown in Figure 11, Fig 10 and Figure 12 to demonstrate the effectiveness and  
37 interpretation of VAHG, QAHG and CVM in two tasks, respectively.

38 The fourth example is shown in Figure 14, Fig 13 and Figure 15 to demonstrate the effectiveness and  
39 interpretation of VAHG, QAHG and CVM in two tasks, respectively.

40 The fifth example is shown in Figure 17, Fig 16 and Figure 18 to demonstrate the effectiveness and  
41 interpretation of VAHG, QAHG and CVM in two tasks, respectively.

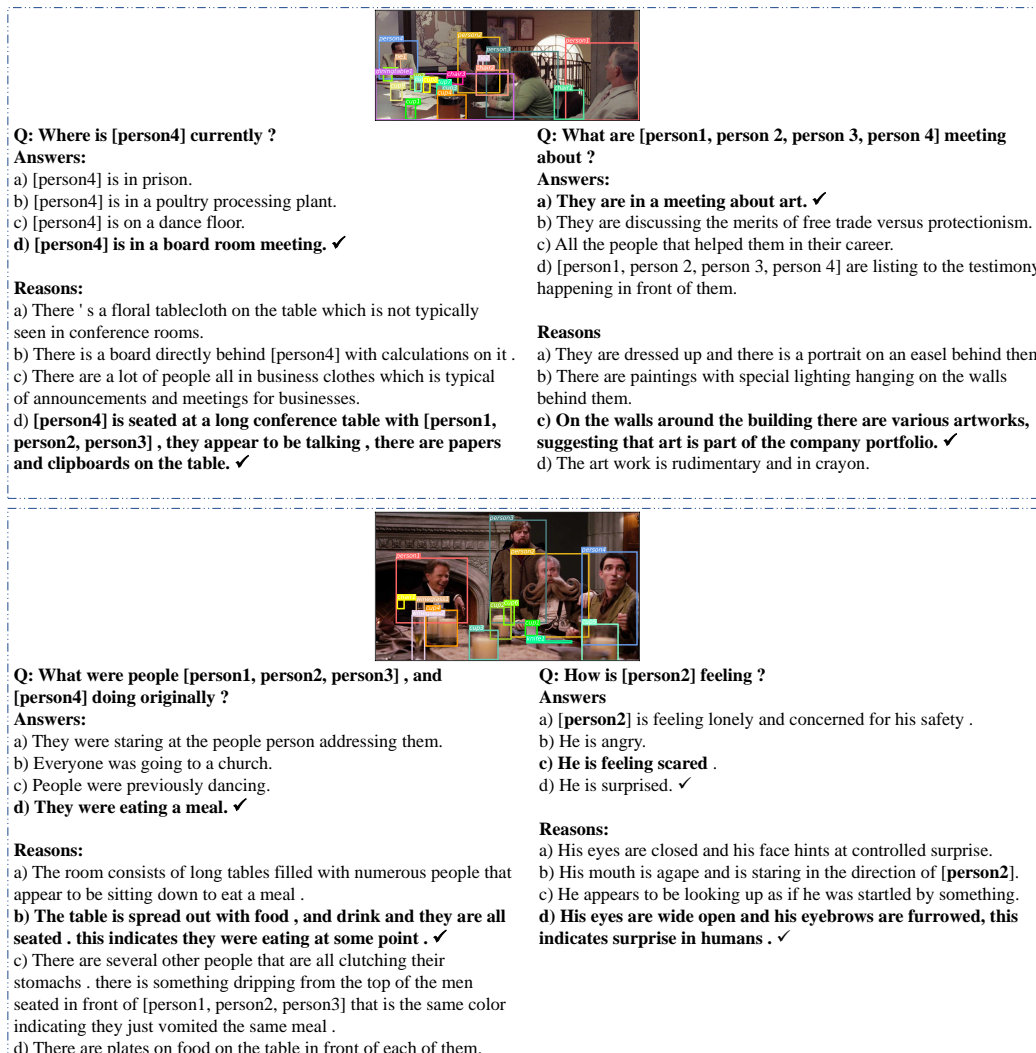

Figure 2: Qualitative results of our HGL. The predicted result is shown as **bold** font, and the ground truth (GT) is shown as ✓. Please zoom in the colored PDF version of this paper for more details.

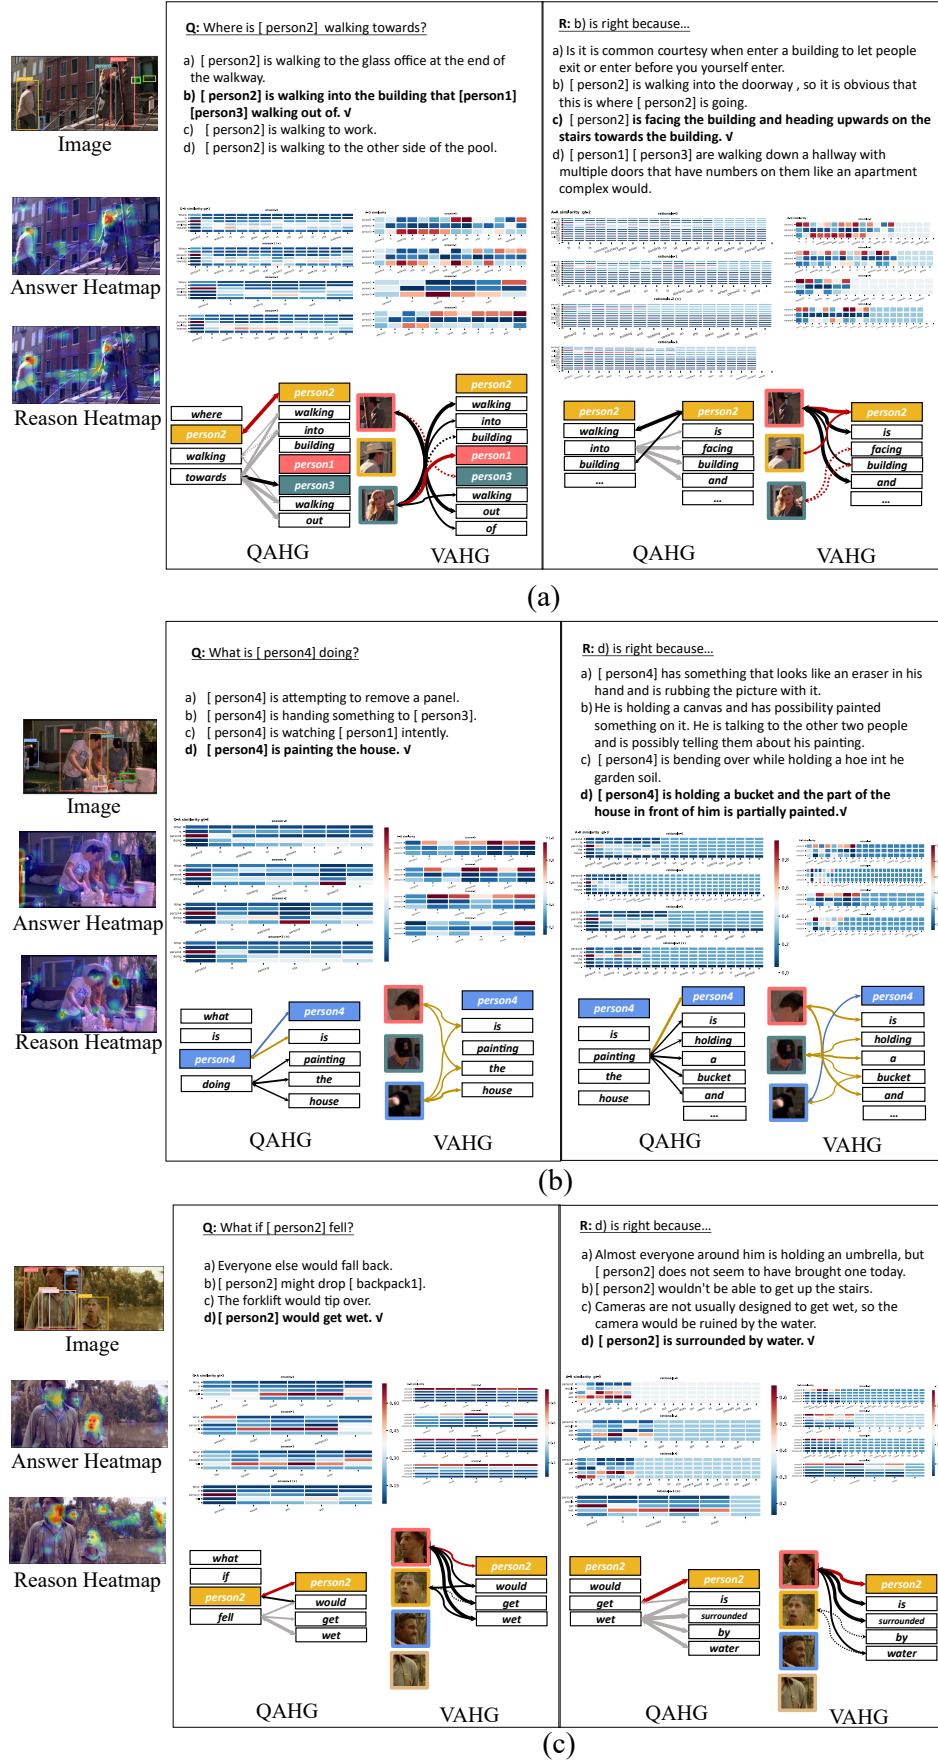

Figure 3: The pipeline of the interpretative visualization. The predicted result is shown as **bold** font, and the ground truth (GT) is shown as ✓. Please zoom in the colored PDF version of this paper for more details.



**Q:** Why are [ person3 person4 ] attacking [person2] ?

- a) [person2] was trying to kill [ person3 person4 ] and it did not work. ✓  
b) The bikers are mad at [person2] and want to hurt them.  
c) [ person3 person4 ] are policeman, it appears [person2] was in a fight.  
d) They want him to leave.

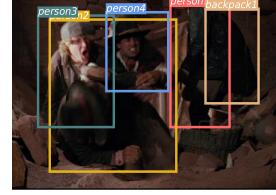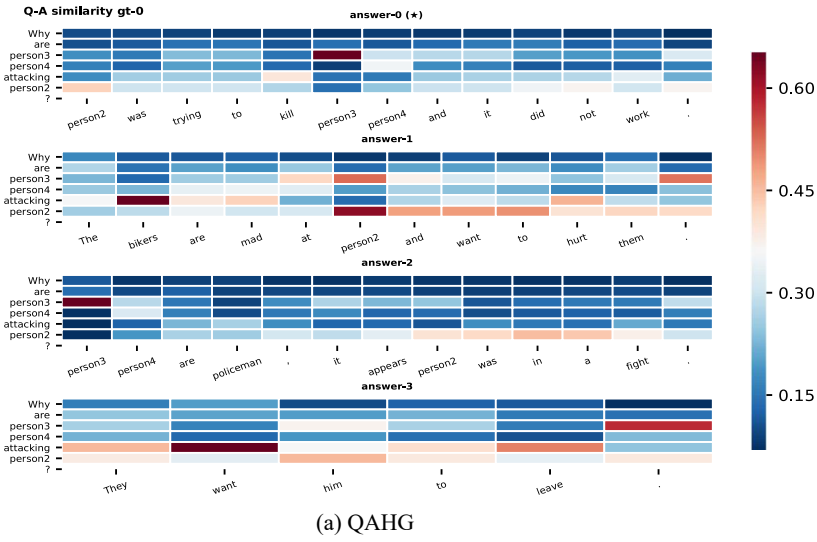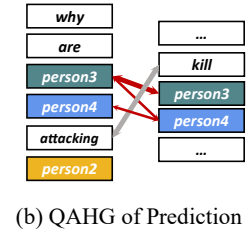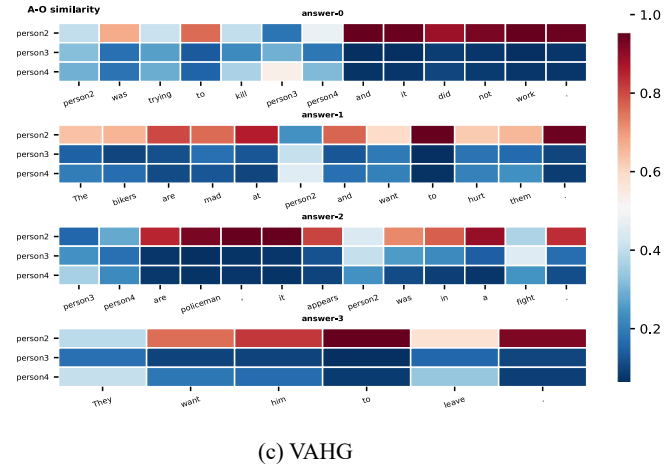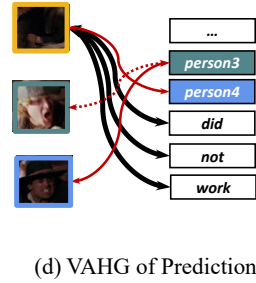

Figure 4: The first example in answer task. The predicted result is shown as **bold** font, and the ground truth (GT) is shown as ✓. Note that the line thickness represents weight, more thick line denotes more important connection according to more high value in the correlative matrices.

**R: a) is right because...**

- a) **[ person3 person4 ] now have the upper hand.** ✓
- b) They are bloodthirsty warriors and watching men kill each other fulfills their psychotic desires.
- c) Many women are assaulted sexually each day all over the world it is sadly a common reason to attack a woman.
- d) [person2] was running around and being loud so they bound her hands and feet and gagged her.

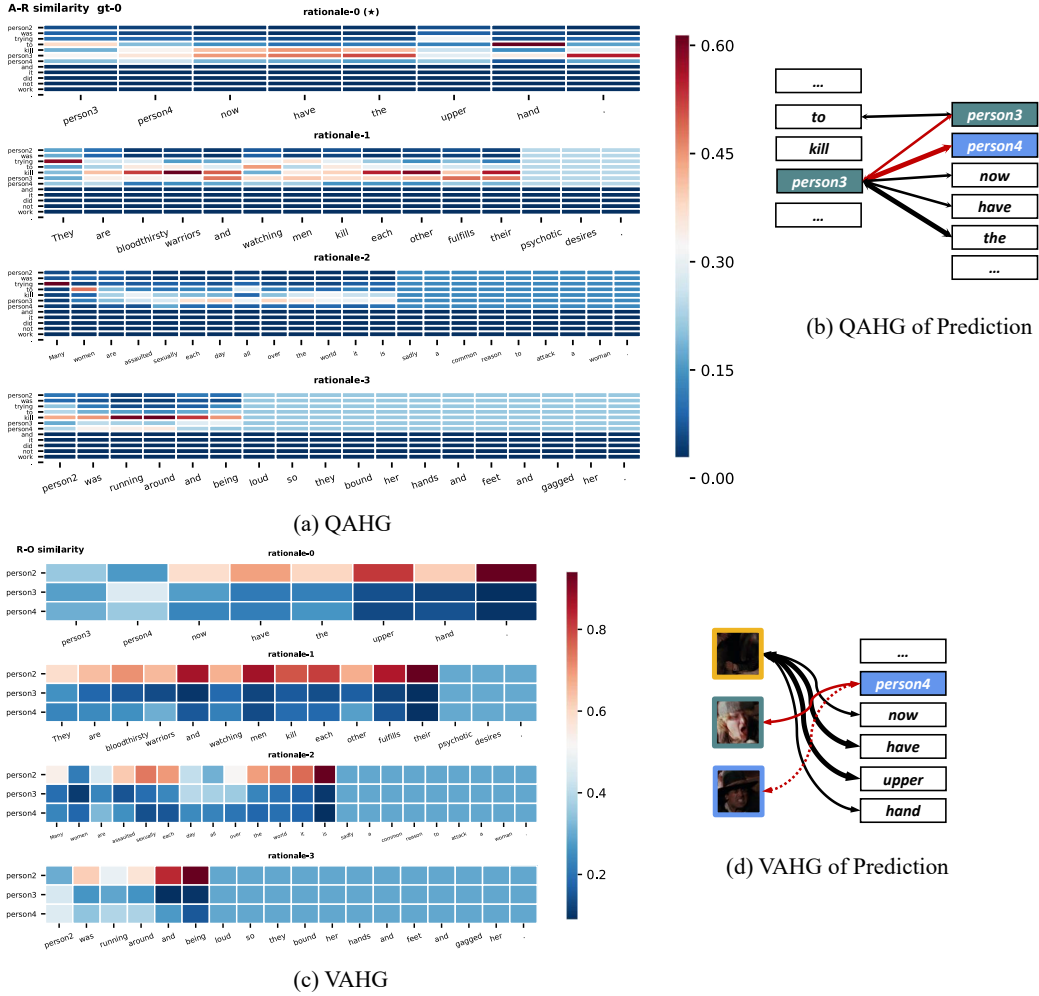

Figure 5: The first example in reason task. The predicted result is shown as **bold** font, and the ground truth (GT) is shown as ✓. Note that the line thickness represents weight, more thick line denotes more important connection according to more high value in the correlative matrices.

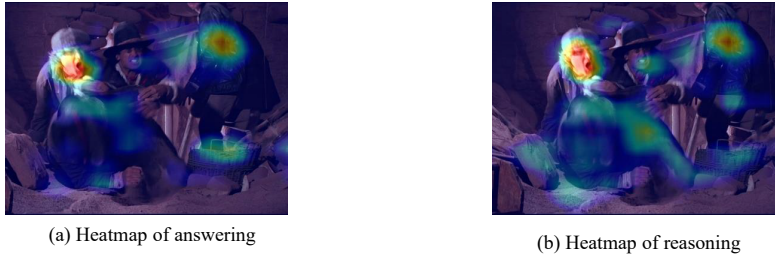

Figure 6: Visualization of CVM to the first example in two tasks.

**Q:** What is [person1] thinking ?

- a) She's thinking that [person3] is very interesting.
- b) [person1] is wondering why [person4] is talking to her. ✓**
- c) She would like to leave.
- d) She is probably wondering why there are a dance party in the restaurant.

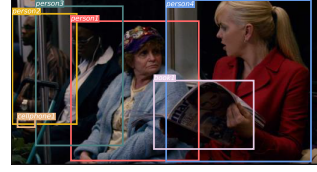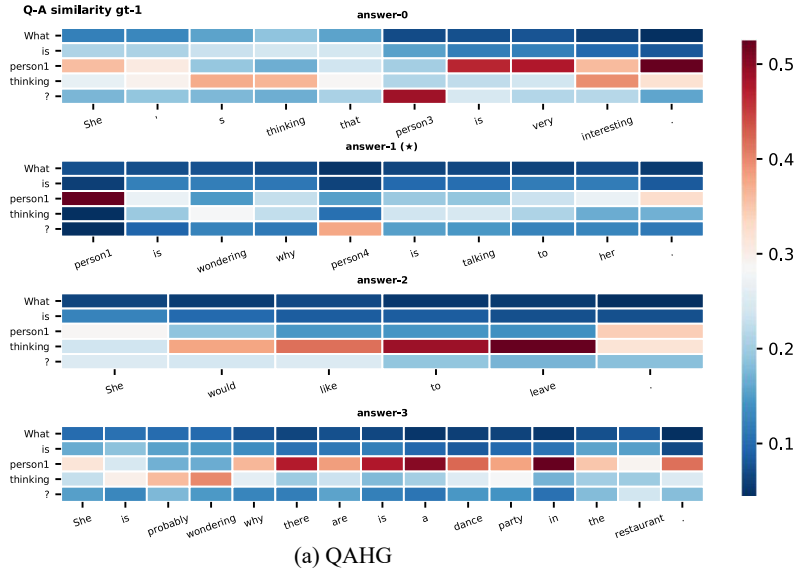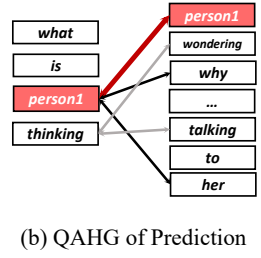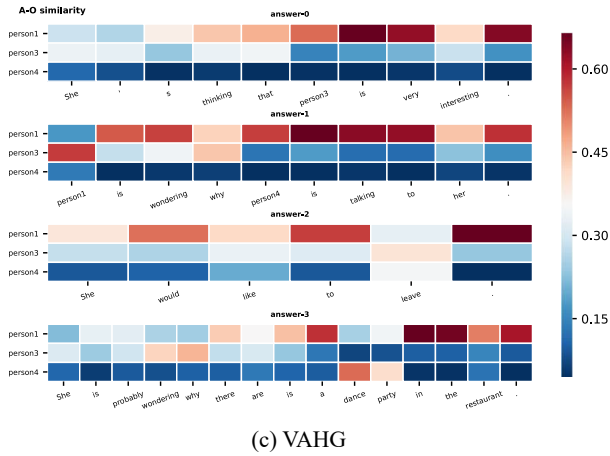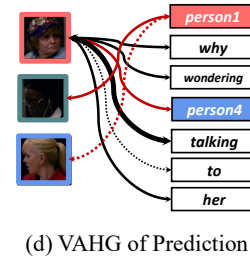

Figure 7: The second example in answer task. The predicted result is shown as **bold** font, and the ground truth (GT) is shown as ✓. Note that the line thickness represents weight, more thick line denotes more important connection according to more high value in the correlative matrices.

**R:** b) is right because...

- a)[person1] is turned around and is staring at [person4].  
**b)[person1] appears to look unsocial and very unfriendly. It appears as if [person1] does not want to hear what [person4] has to say. ✓**  
c)[person1] is still talking to the group, but is looking at [person4].  
d)[person1] is looking at [person4] with a curious expression.

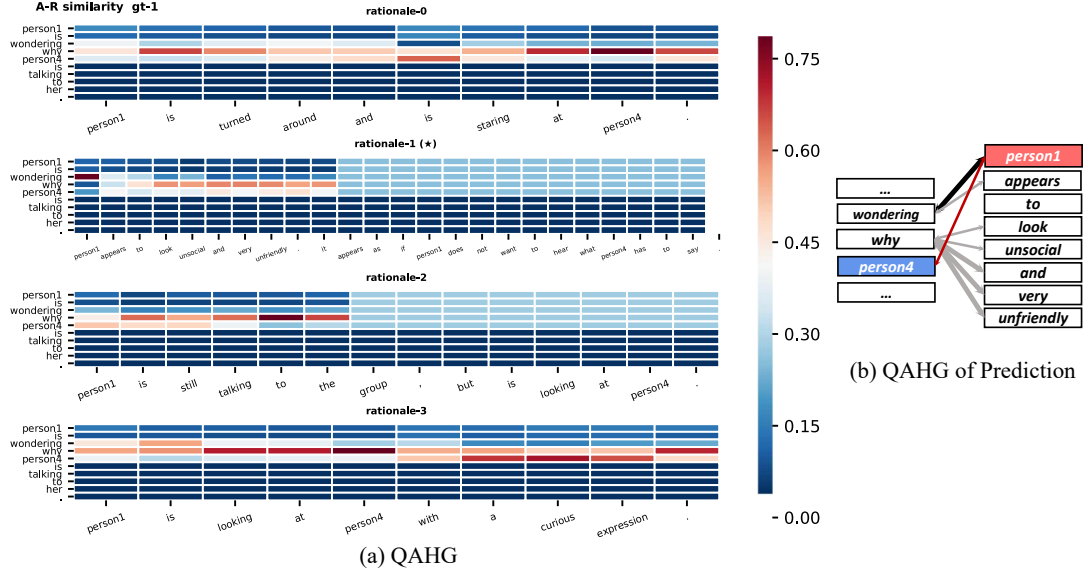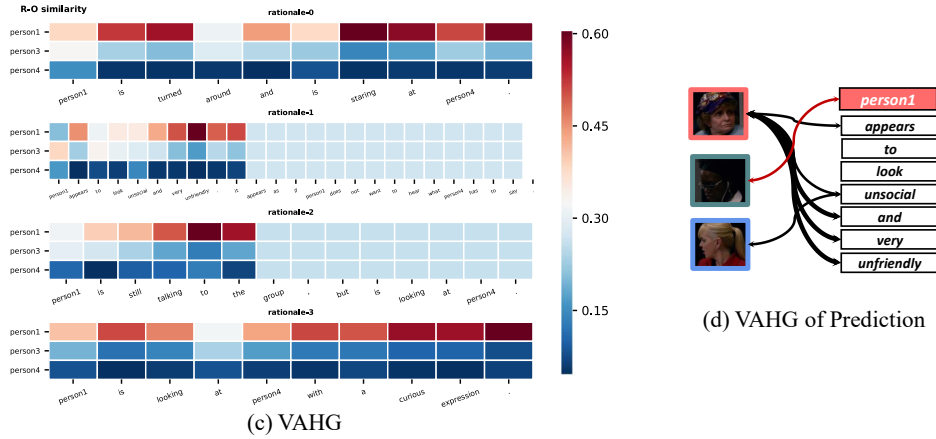

Figure 8: The second example in reason task. The predicted result is shown as **bold** font, and the ground truth (GT) is shown as ✓. Note that the line thickness represents weight, more thick line denotes more important connection according to more high value in the correlative matrices.

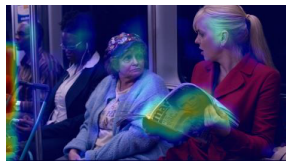

(a) Heatmap of answering

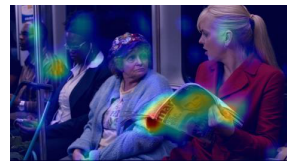

(b) Heatmap of reasoning

Figure 9: Visualization of CVM to the second example in two tasks.

**Q:** Where is [person2] walking towards?

- a) [person2] is walking to the glass office at the end of the walkway.
- b) [person2] is walking into the building that [ person1 person3 ] are walking out of. ✓**
- c) [person2] is walking to work.
- d) [person2] is walking to the other side of the pool.

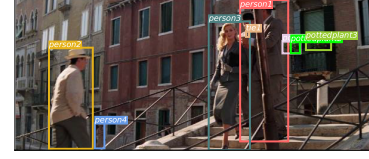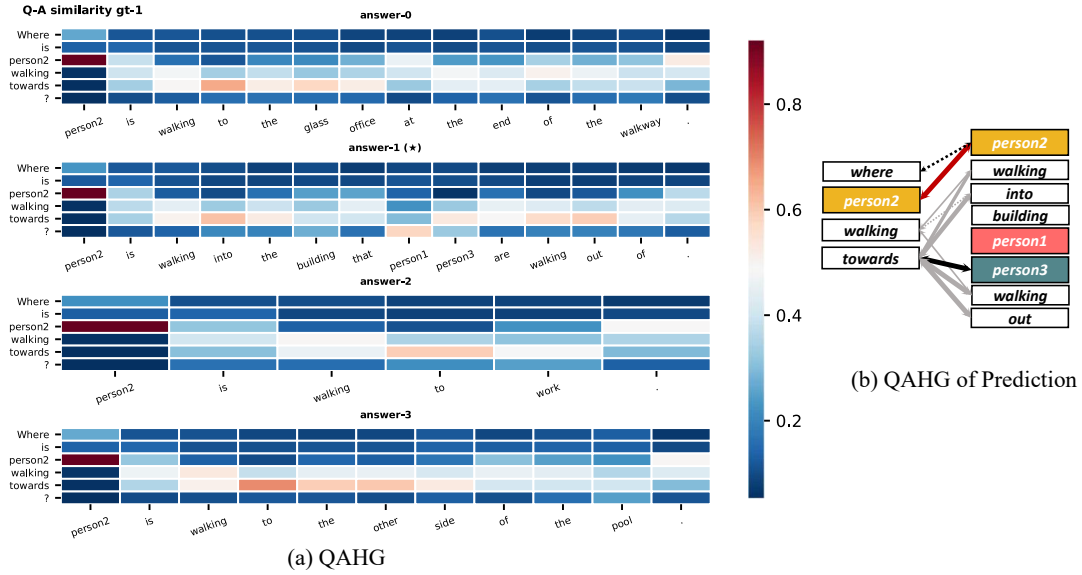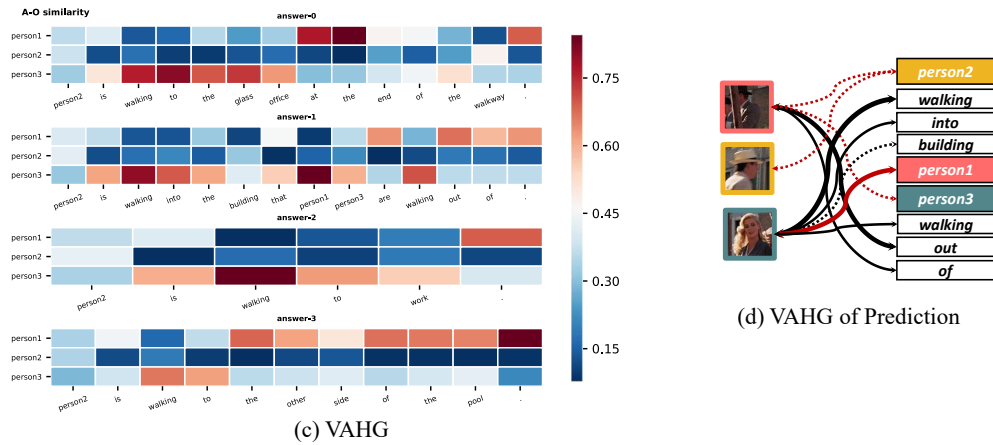

Figure 10: The third example in answer task. The predicted result is shown as **bold** font, and the ground truth (GT) is shown as ✓. Note that the line thickness represents weight, more thick line denotes more important connection according to more high value in the correlative matrices.

R: b) is right because...

- a) Is it common courtesy when enter a building to let people exit or enter before you yourself enter.
- b) [person2] is walking into the doorway, so it is obvious that this is where [person2] is going.
- c) **[person2] is facing the building and heading upwards on the stairs towards the building.** ✓
- d) [ person1 person3 ] are walking down a hallway with multiple doors that have numbers on them like an apartment complex would.

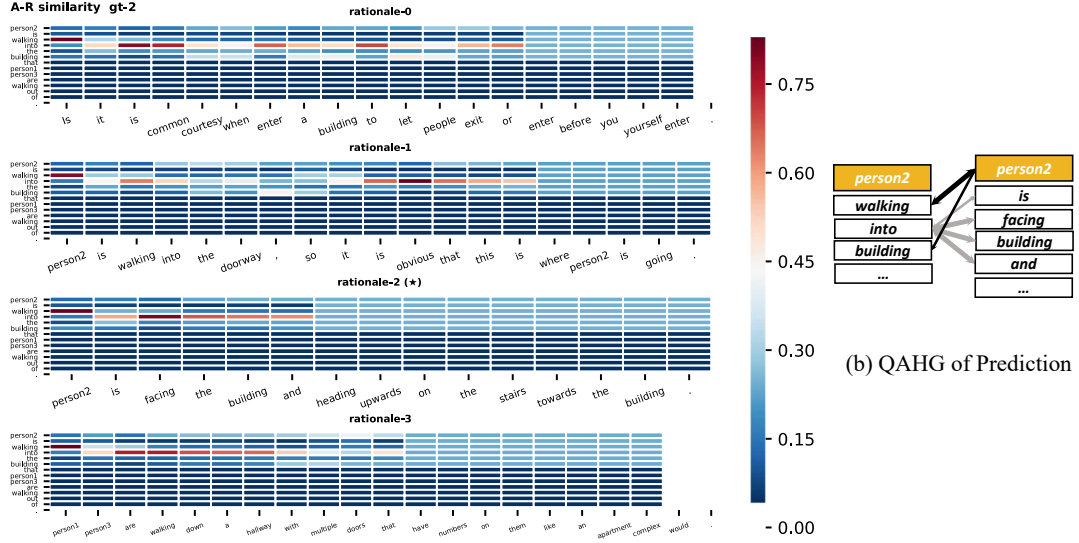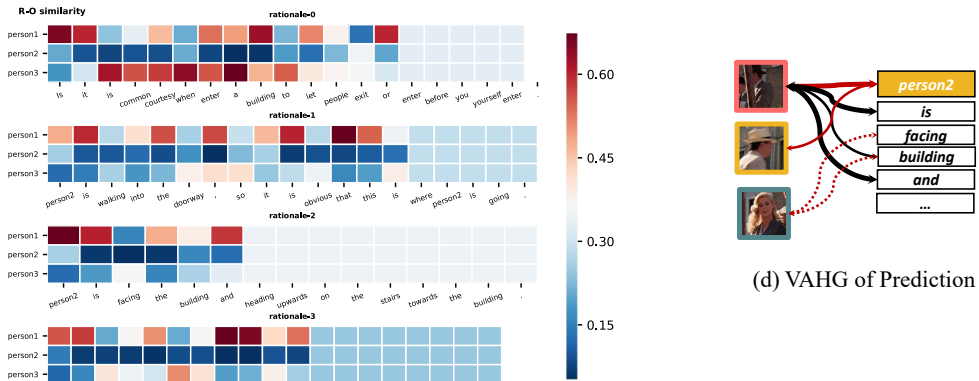

Figure 11: The third example in reason task. The predicted result is shown as **bold** font, and the ground truth (GT) is shown as ✓. Note that the line thickness represents weight, more thick line denotes more important connection according to more high value in the correlative matrices.

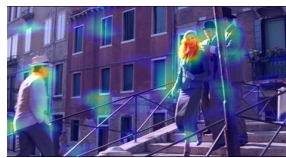

(a) Heatmap of answering

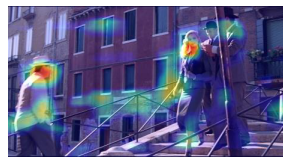

(b) Heatmap of reasoning

Figure 12: Visualization of CVM to the third example in two tasks.

**Q:** Why is [person2] gesturing with his hands?

- a) [person2] is explaining how to dance.
- b) [person2] is having an argument at the dinner table. ✓**
- c) [person2] is trying to explain the rock to [person1].
- d) [person2] is telling the crowd of people behind [person1 person4] to be quiet.

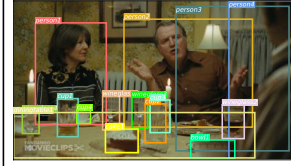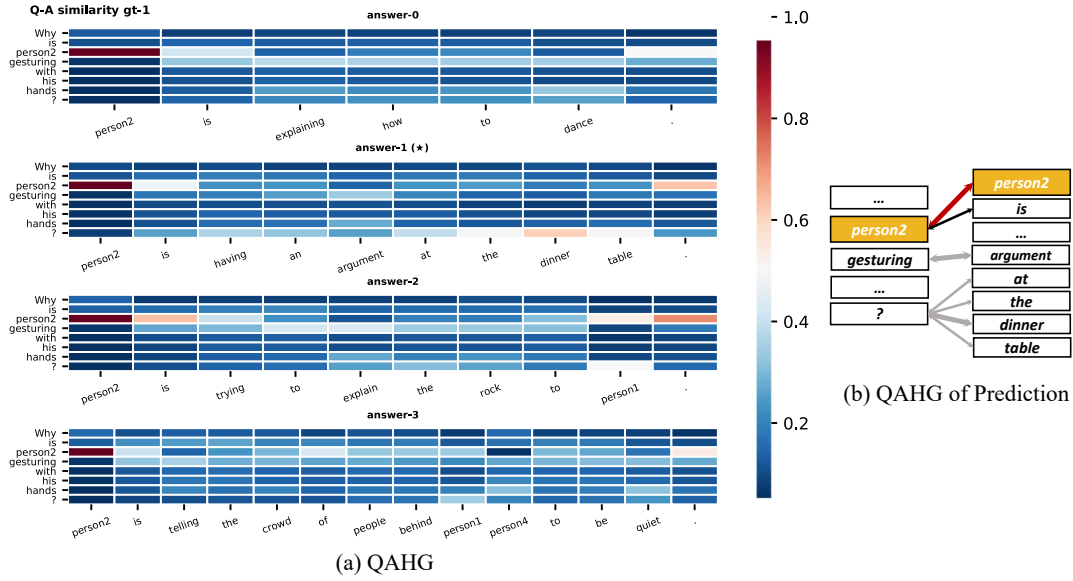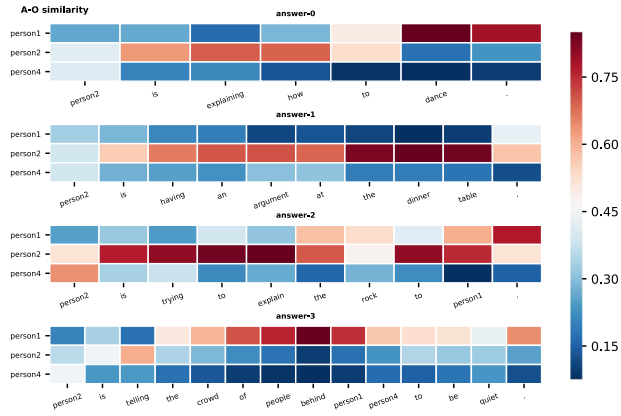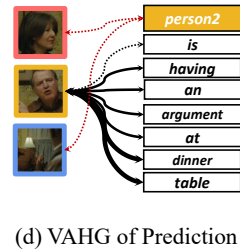

Figure 13: The fourth example in answer task. The predicted result is shown as **bold** font, and the ground truth (GT) is shown as ✓. Note that the line thickness represents weight, more thick line denotes more important connection according to more high value in the correlative matrices.



**R: b) is right because...**

- a) [person2] is at the dinner table and calling other people for dinner.
- b) Everyone is at a dinner table and [person2] is making an exasperated expression while talking. ✓**
- c) Both [ person2 person4 ] are sitting at the table and [person2] is gesturing.
- d) Some people talk wildly with their hands.

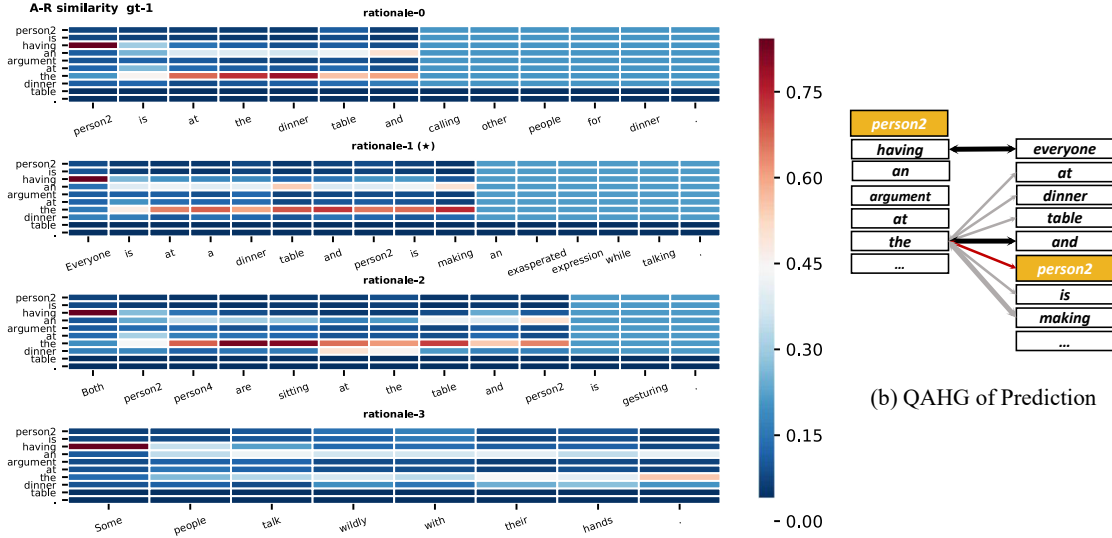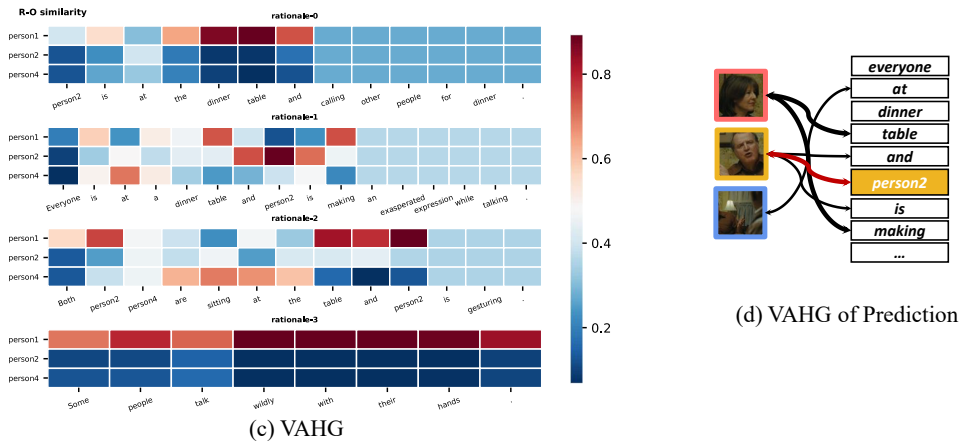

Figure 14: The fourth example in reason task. The predicted result is shown as **bold** font, and the ground truth (GT) is shown as ✓. Note that the line thickness represents weight, more thick line denotes more important connection according to more high value in the correlative matrices.

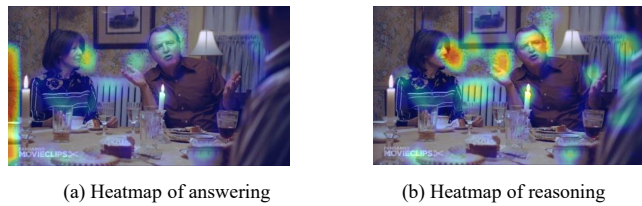

Figure 15: Visualization of CVM to the fourth example in two tasks.

**Q:** Why is [ person1 person2 ] staring at [person3]?

- a) [person3] is their leader.
- b) [person3] should be sitting at the dining table. ✓**
- c) [ person1 person2 ] are there to arrest [person3].
- d) They have been waiting for [person3] to return with their goods.

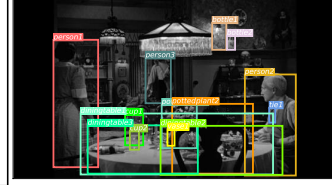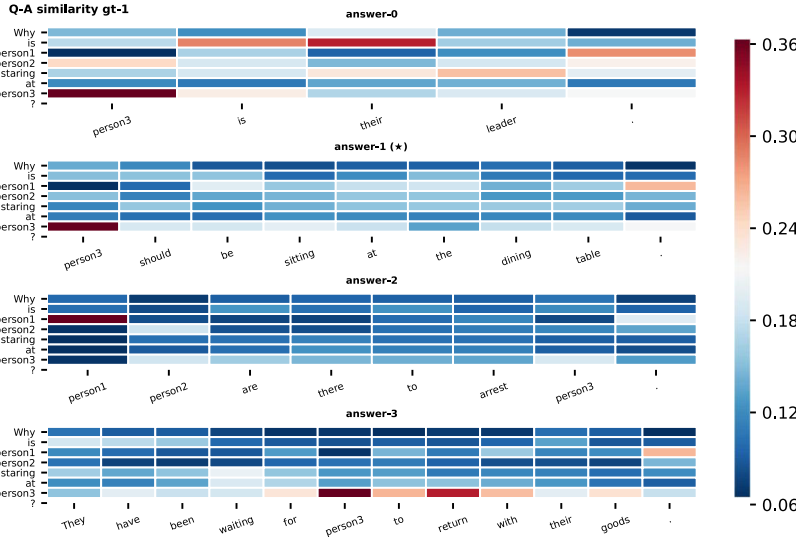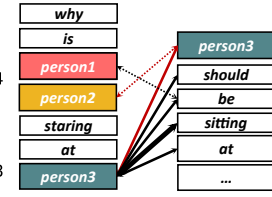

(b) QAHG of Prediction

(a) QAHG

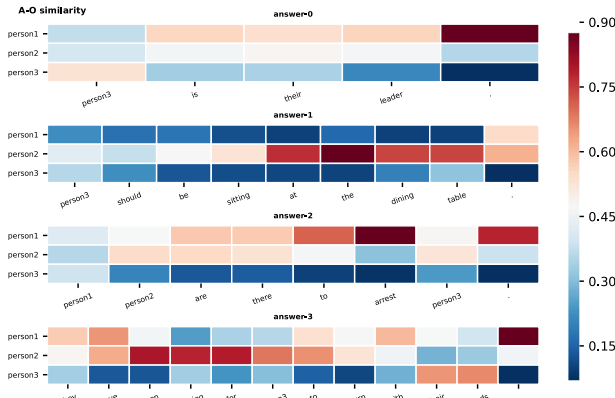

(c) VAHG

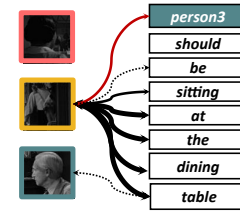

(d) VAHG of Prediction

Figure 16: The fifth example in answer task. The predicted result is shown as **bold** font, and the ground truth (GT) is shown as ✓. Note that the line thickness represents weight, more thick line denotes more important connection according to more high value in the correlative matrices.

**R: b) is right because...**

- a) [person3] is somewhat close to [diningtable3] so [person3] could have arrived on [diningtable3].
- b) [person3] is at the window instead of sitting at the dining table. ✓**
- c) [ person1 person2 ], and [person3] are turned around to see something but it isn't [diningtable2]. [diningtable2] is a chair and not very interesting.
- d) We see only one chair. probably others want [person3] to use chair.

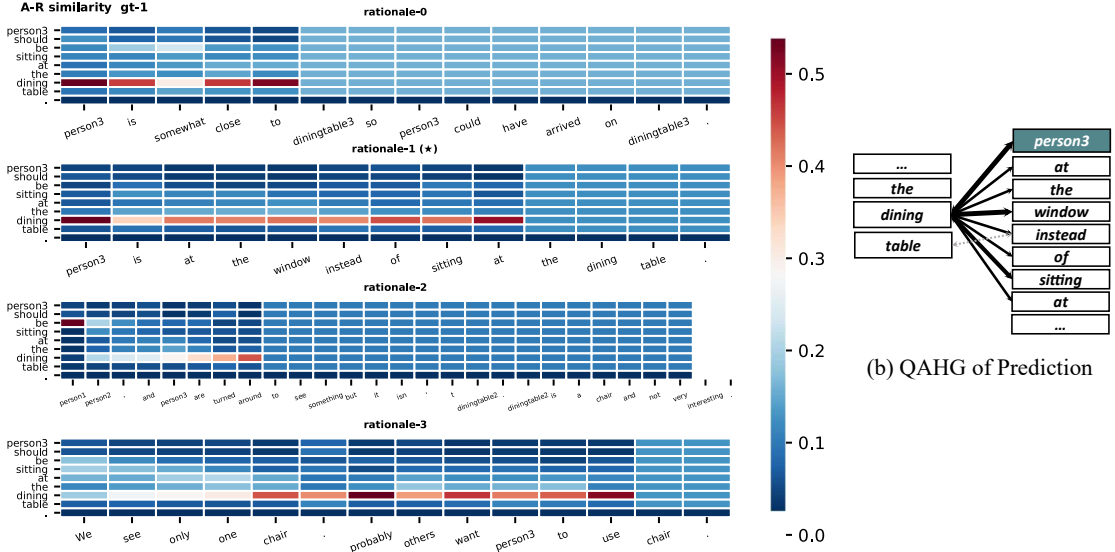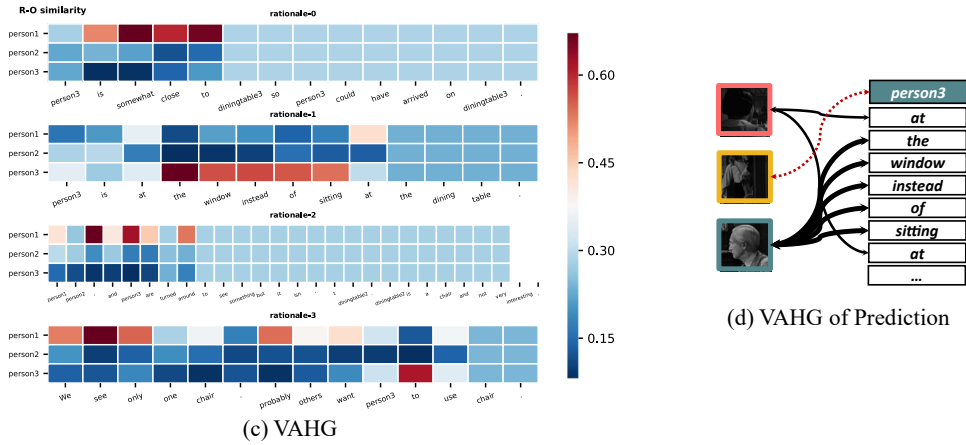

Figure 17: The fifth example in reason task. The predicted result is shown as **bold** font, and the ground truth (GT) is shown as ✓. Note that the line thickness represents weight, more thick line denotes more important connection according to more high value in the correlative matrices.

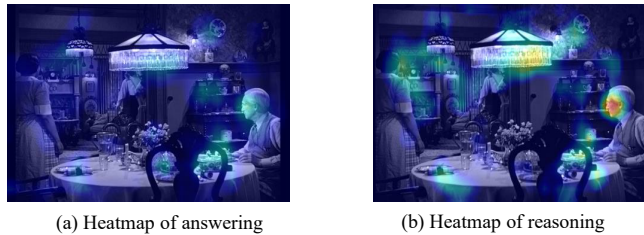

Figure 18: Visualization of CVM to the fifth example in two tasks.

## 42 **References**

- 43 [1] R. Zellers, Y. Bisk, A. Farhadi, and Y. Choi. From recognition to cognition: Visual commonsense  
44 reasoning. *arXiv preprint arXiv:1811.10830*, 2018.
